# Supplementary material for: Vaccine Preventable Zoonotic Diseases: Challenges and Opportunities for Public Health Progress
Source: MDPI journal article supplement (doi:10.3390/vaccines10070993), 2022-06-22
Supplement: s1 [file s1]

**Table S1.** Burden of vaccine-preventable zoonoses and vaccine availability.

| Pathogen                                         | Impact of Human Disease                                                                                                                                                             |                                                                                             | Transmission Routes                                                                 | Human Vaccine Status                       |                       | Animal Vaccine Status                                                                 |                                                                       | Animal Species Affected                                      |
|--------------------------------------------------|-------------------------------------------------------------------------------------------------------------------------------------------------------------------------------------|---------------------------------------------------------------------------------------------|-------------------------------------------------------------------------------------|--------------------------------------------|-----------------------|---------------------------------------------------------------------------------------|-----------------------------------------------------------------------|--------------------------------------------------------------|
|                                                  | Domestic                                                                                                                                                                            | Global                                                                                      |                                                                                     | Domestic                                   | Global                | Domestic                                                                              | Global                                                                |                                                              |
| <i>Bacillus anthracis</i> (anthrax)              | 127 cases were identified annually in the early part of the 20th century, and have subsequently declined to less than 1 case per year—a rate maintained for the past 20 years [100] | Between 20,000 and 100,000 cases identified annually [101]                                  | Direct contact, food-borne, airborne                                                | Licensed for preexposure prophylaxis [102] | Licensed [103]        | Licensed                                                                              | Licensed [104]                                                        | Livestock                                                    |
| <i>Bartonella henselae</i> (cat scratch disease) | Estimated 12,500 cases/year [105]                                                                                                                                                   | Not available                                                                               | Direct contact (scratch)                                                            | Not available                              | Not available         | Not available                                                                         | Not available                                                         | Feline                                                       |
| <i>Borrelia burgdorferi</i> (Lyme disease)       | 30,000 cases annually; however, estimates based on insurance records suggest that each year approximately 476,000 Americans are diagnosed and treated [92]                          | Global burden of disease is not well characterized                                          | Vector-borne ( <i>Ixodes</i> ticks)                                                 | Investigational [106]                      | Not available         | Licensed (canine) Investigational (wildlife)                                          | Licensed (Canada)                                                     | Canine<br>Peromyscus mice                                    |
| <i>Brucella</i> spp. (Brucellosis)               | 80–120 cases per year [16]                                                                                                                                                          | >500,000 cases reported annually [107]                                                      | Direct contact with infected material (placenta, aborted fetuses, etc.), food-borne | Not available                              | Not available         | <i>Brucella abortus</i> and <i>B. melitensis</i> Licensed Investigational (wildlife)  | Licensed [108]                                                        | Bovine, caprine, ovine, wildlife (bison, elk), swine, canine |
| <i>Burkholderia mallei</i> (glanders)            | Zero cases since 1934 [109]                                                                                                                                                         | Not available                                                                               | Direct contact, airborne                                                            | Investigational [110]                      | Investigational [111] | Not available                                                                         | Not available                                                         | <i>Burkholderia mallei</i> (glanders)                        |
| <i>Campylobacter jejuni</i>                      | Estimated 845,024 cases per year [111]                                                                                                                                              | 7.5 million disability-adjusted life years in the 2010 Global Burden of Disease Study [112] | Food-borne, waterborne, direct contact                                              | Not available                              | Not available         | Vaccines are not available for enteritis but can prevent abortions in sheep; they are | Vaccines are not available for enteritis but can prevent abortions in | Chicken, sheep, cow                                          |

|                                                  |                                                                                   |                                                    |                                        |                       |                            |               |                                                                                                                                         |                                                                                                                                                         |  |
|--------------------------------------------------|-----------------------------------------------------------------------------------|----------------------------------------------------|----------------------------------------|-----------------------|----------------------------|---------------|-----------------------------------------------------------------------------------------------------------------------------------------|---------------------------------------------------------------------------------------------------------------------------------------------------------|--|
|                                                  |                                                                                   |                                                    |                                        |                       |                            |               | also useful for both prophylaxis and treatment in bovine genital campylobacteriosis; however, vaccinated cows may remain carriers [113] | sheep; they are also useful for both prophylaxis and treatment in bovine genital campylobacteriosis; however, vaccinated cows may remain carriers [113] |  |
| <i>Chlamydophila abortus</i> (chlamydiosis)      | Not well characterized                                                            | Not available                                      | Direct contact                         | Not available         | Not available              | Licensed      | Licensed                                                                                                                                | Caprine, ovine, cats                                                                                                                                    |  |
| <i>Chlamydophila psittaci</i> (parrot fever)     | Since 2010, there have typically been fewer than 10 cases reported annually [114] | Not available                                      | Direct contact, airborne               | Not available         | Not available              | Not available | Not available                                                                                                                           | Psittaciform pet birds, poultry                                                                                                                         |  |
| <i>Coxiella burnetii</i> (Q fever)               | In 2019, 178 acute and 34 chronic cases were reported [115]                       | Global burden of disease is not well characterized | Aerosol, direct contact, foodborne     | Not available         | Licensed (Australia) [116] | Not available | Licensed (European Union) [117]                                                                                                         | <i>Coxiella burnetii</i> (Q fever)                                                                                                                      |  |
| <i>Cryptosporidia parvum</i> (cryptosporidiosis) | An estimated 322,000,000 cases attributed to water occur annually [118]           | Not well characterized                             | Direct contact, food-borne, waterborne | Not available         | Not available              | Not available | Not available                                                                                                                           | Cryptosporidiosis ( <i>Cryptosporidia parvum</i> )                                                                                                      |  |
| Eastern equine encephalitis virus                | Average of 11 cases/year [119]                                                    | Not available                                      | Vector-borne                           | Investigational [120] | Investigational [121]      | Licensed      | Licensed [122]                                                                                                                          | Equine, donkey, mule; off-label use in camelids, emus                                                                                                   |  |
| <i>Zaire ebolavirus</i> (Ebola virus disease)    |                                                                                   | Sporadic outbreaks; 28,639 suspected,              | Direct contact                         | Licensed [124]        | Licensed [125]             | Not available | Not available                                                                                                                           | Non-human primates and bats [126]                                                                                                                       |  |

|                                      |                                                                |                                                                                                                                                                                                                                                                         |                                                                                                                                              |                                                                               |                       |                       |                            |                |
|--------------------------------------|----------------------------------------------------------------|-------------------------------------------------------------------------------------------------------------------------------------------------------------------------------------------------------------------------------------------------------------------------|----------------------------------------------------------------------------------------------------------------------------------------------|-------------------------------------------------------------------------------|-----------------------|-----------------------|----------------------------|----------------|
|                                      |                                                                | probable, and confirmed cases of Ebola and 11,316 deaths from Ebola during the 2014 epidemic in West Africa [123]                                                                                                                                                       |                                                                                                                                              |                                                                               |                       |                       |                            |                |
| <i>Escherichia coli</i> (food-borne) | Estimated 205,781 food-borne E. coli infections annually [111] | Estimated >300 M illnesses annually [127]                                                                                                                                                                                                                               | Food-borne, water-borne, direct contact, indirect contact, fomite                                                                            | Investigational [128]                                                         | Not available         | Licensed              | Licensed [129]             | Bovine         |
| Hendra virus                         |                                                                | Between 1994 and 2013, 7 human cases were reported [130]                                                                                                                                                                                                                | Direct contact                                                                                                                               | Not available                                                                 | Investigational [131] | Not available         | Licensed (Australia) [132] | Equine         |
| Influenza virus                      | Avian                                                          | Avian: four human infections identified in the US since 2002 [133]                                                                                                                                                                                                      | Avian: approximately 45 cases annually [135]                                                                                                 |                                                                               |                       |                       |                            |                |
|                                      | Swine                                                          | Swine: from April 12, 2009 to April 10, 2010, CDC estimated there were 60.8 million cases (range: 43.3–89.3 million), 274,304 hospitalizations (range: 195,086–402,719), and 12,469 deaths (range: 8868–18,306) in the United States due to the (H1N1)pdm09 virus [134] | Swine: CDC estimated that 151,700–575,400 people worldwide died from (H1N1)pdm09 virus infection during the first year the virus circulated. | Air-borne, direct contact, indirect contact (e.g., contaminated environments) | Licensed [136]        | Licensed [137]        | Licensed [138]             | Licensed [139] |
| Japanese encephalitis virus          |                                                                | An estimated 68,000 cases and 15,000 deaths occur yearly [140]                                                                                                                                                                                                          | Vector-borne                                                                                                                                 | Licensed                                                                      | Licensed              | Investigational [141] | Licensed                   | Equine         |

|                              |                                                                                      |                                                                                       |                                                                                                                                                       |                                                  |                                                  |                                   |                                            |                                                |
|------------------------------|--------------------------------------------------------------------------------------|---------------------------------------------------------------------------------------|-------------------------------------------------------------------------------------------------------------------------------------------------------|--------------------------------------------------|--------------------------------------------------|-----------------------------------|--------------------------------------------|------------------------------------------------|
| <i>Leishmania infantum</i>   |                                                                                      | An estimated 700,000 to 1 million new cases of <i>Leishmania</i> occur annually [142] | Vector-borne                                                                                                                                          | Investigational [143]                            | Investigational [144]                            | Not available                     | Vaccines available in some countries [145] | Canine                                         |
| <i>Leptospira spp.</i>       | 100–200 cases/year [146]                                                             | Estimated >1 M cases/year [146]                                                       | Contact with water contaminated with the urine of infected animals through cuts/abrasions of the skin or through mucous membranes (eyes, nose, mouth) | Not available                                    | Licensed (China) [147]                           | Licensed                          | Licensed [148]                             | Canine, swine, bovine                          |
| MERS-CoV                     |                                                                                      | 242 cases/year [149]                                                                  | Direct or indirect contact—not fully understood                                                                                                       | Investigational [150]                            | Investigational (Germany) [61]                   | Investigational (in chimps) [151] | Not available                              | Camel                                          |
| <i>Mycobacterium bovis</i>   | <i>M. bovis</i> causes less than 2% of the total number of cases of TB disease [152] | Not available                                                                         | Food-borne, air-borne                                                                                                                                 | BCG vaccine for infants and young children [153] | BCG vaccine for infants and young children [153] | Investigational [154]             | Investigational [154]                      | Badger, deer, marsupials, wild boar            |
| Nipah virus                  |                                                                                      | Cases occur sporadically [155]                                                        | Direct contact, food-borne                                                                                                                            | Not available                                    | Not available                                    | Investigational [156]             | Investigational [156]                      | Caprine, ovine, bovine                         |
| <i>Pasteurella multocida</i> | Not well characterized [157]                                                         | Not available                                                                         | Direct contact, possibly air-borne                                                                                                                    | Not available                                    | Not available                                    | Licensed [158]                    | Licensed [158]                             | Caprine, ovine, bovine, swine, poultry, rabbit |
| Rabies virus                 | 1–3 deaths per year [159]                                                            | 59,000 deaths annually [14]                                                           | Direct contact (bite,                                                                                                                                 | Licensed [160]                                   | Licensed [6]                                     | Licensed oral                     | Licensed oral                              | Wildlife (coyote, gray fox, red fox,           |

|                                                             |                                                                                                                                             |                                                                                                                                               |                                                                        |                                                     |                                                                                          |                                                                                               |                           |                                                                                             |
|-------------------------------------------------------------|---------------------------------------------------------------------------------------------------------------------------------------------|-----------------------------------------------------------------------------------------------------------------------------------------------|------------------------------------------------------------------------|-----------------------------------------------------|------------------------------------------------------------------------------------------|-----------------------------------------------------------------------------------------------|---------------------------|---------------------------------------------------------------------------------------------|
|                                                             |                                                                                                                                             |                                                                                                                                               | contamination of mucous membranes such as eyes, nose, mouth), airborne |                                                     |                                                                                          | Licensed parenteral                                                                           | Licensed parenteral [161] | raccoons, raccoon dogs, skunks), canine Canine, feline, ferret, equine, livestock, camelids |
| <i>Rickettsia rickettsii</i> (Rocky Mountain spotted fever) | In 2019, 5207 cases of spotted fever group rickettsioses, which includes infections of <i>R. rickettsii</i> , were reported in the US [162] | Burden of disease is not well characterized; distributed broadly, albeit reported at a low frequency, throughout the Western Hemisphere [163] | Tick-borne                                                             | In development [164]                                | Not available                                                                            | Not available, used as a model for human vaccine development                                  | Not available             | Primarily dogs                                                                              |
| Rift Valley fever virus                                     |                                                                                                                                             | Global burden of disease is not well characterized                                                                                            | Direct contact, vector-borne                                           | Not available                                       | Investigational [165]                                                                    | Not available                                                                                 | Licensed [166]            | Livestock (cattle, buffalo, sheep, goats, and camels)                                       |
| <i>Salmonella</i> (food-borne)                              | Estimated 1,027,56 non-typhoidal cases annually [111]                                                                                       | Estimated 80.3 M cases annually [167]                                                                                                         | Food-borne, direct contact, indirect contact, fomite                   | Investigational [168]                               | Licensed [169]                                                                           | Licensed [170]                                                                                | Licensed [129]            | Poultry, bovine, swine; however, animal vaccines are limited in use                         |
| SARS-CoV-2                                                  | Over 78 M confirmed cases and 900,000 deaths (as of March 2022) [171]                                                                       | Over 430 M cases and 5.9 M deaths (as of March 2022) [171]                                                                                    | Aerosol                                                                | Licensed: Pfizer and Moderna EUA: Johnson & Johnson | Licensed in various countries: Moderna, Pfizer, Johnson & Johnson, AstraZeneca, Novovax, | Not licensed; experimental use with Zoetis vaccine authorization in mink and zoo animals [67] | Licensed (Russia) [173]   | Companion animals, farmed mink, zoo and aquaria animals, wildlife                           |

|                                      |                                                                                                 |                                                                                                                                           |                                                                                         |                       |                       |               |                                                                                         |                       |
|--------------------------------------|-------------------------------------------------------------------------------------------------|-------------------------------------------------------------------------------------------------------------------------------------------|-----------------------------------------------------------------------------------------|-----------------------|-----------------------|---------------|-----------------------------------------------------------------------------------------|-----------------------|
|                                      |                                                                                                 | Covovax,<br>Covishield,<br>Covaxin,<br>Sinopharm,<br>Sinovac [172]                                                                        |                                                                                         |                       |                       |               |                                                                                         |                       |
| <i>Toxoplasma gondii</i>             | Estimated that 11% of the population 6 years and older have been infected with Toxoplasma [174] | In various places throughout the world, it has been shown that more than 60% of some populations have been infected with Toxoplasma [174] | Food-borne, water-borne, direct contact, indirect contact (environmental contamination) | Not available         | Not available         | Not available | Experimental (cats) [175]                                                               | Feline, ovine         |
| Venezuelan equine encephalitis virus |                                                                                                 | Outbreaks have been reported in the Americas since 1935; the largest outbreaks caused approximately 75,000 human cases [176]              | Vector-borne                                                                            | Investigational       | Investigational       | Licensed      | Licensed (in horses)                                                                    | Equine, donkey, mule  |
| Vesicular stomatitis virus           |                                                                                                 | Not available                                                                                                                             | Direct contact                                                                          | Not available         | Not available         | Not available | Commercial vaccines are available in some endemic regions of Central and South America. | Equine, bovine, swine |
| Western equine encephalitis virus    | Since 1964 there have been fewer than 700 confirmed cases [177]                                 | Not available                                                                                                                             | Vector-borne                                                                            | Investigational [178] | Investigational [179] | Licensed      | Licensed [122]                                                                          |                       |

|                                 |                                                                                                                                                                                                                                                                                                               |                                                                                                                  |                              |                       |                       |                                                                                                                                                                |                |                                |
|---------------------------------|---------------------------------------------------------------------------------------------------------------------------------------------------------------------------------------------------------------------------------------------------------------------------------------------------------------|------------------------------------------------------------------------------------------------------------------|------------------------------|-----------------------|-----------------------|----------------------------------------------------------------------------------------------------------------------------------------------------------------|----------------|--------------------------------|
| West Nile virus                 | Over the 20-year existence of WNV in the US (between 1999 and 2019), a total of 51,702 cases were reported to CDC [180]; the total societal costs of WNV hospitalized cases and deaths as reported to CDC for 1999–2012 was estimated to be roughly USD 778 million dollars or ~USD 56 million per year [181] | Global burden of disease is not well characterized                                                               | Vector-borne                 | Investigational [182] | Investigational [77]  | Licensed                                                                                                                                                       | Licensed [183] | Equine                         |
| <i>Yersinia pestis</i> (plague) | Not available                                                                                                                                                                                                                                                                                                 | 1000–2000 cases are reported to the WHO each year, though the true burden of disease is likely much higher [184] | Direct contact, vector-borne | Investigational [184] | Investigational [185] | Vaccination used to protect endangered black-footed ferrets; vaccines in food bait were given to prairie dogs; no vaccination is approved for domestic species |                | Prairie dogs, ferrets, rodents |
